# Supplementary material for: Genome-Wide Identification and Comprehensive Analysis of the GASA Gene Family in Peanuts (Arachis hypogaea L.) under Abiotic Stress
Source: MDPI journal article supplement (doi:10.3390/ijms242317117), 2023-12-04
Supplement: s1 [file s1]

**Table S1. List of primers used for gene expression analysis in this study**

| S.No      | Accession/Gene    | Forward Primer       | Reverse Primer        | GC    | Tm    | Product Size |
|-----------|-------------------|----------------------|-----------------------|-------|-------|--------------|
| Primer-1  | XG1GJV/AhGASA39   | CTTTGTTGGAACCAGCCACT | AGGTGCCAGAAGGAACACAC  | 50/55 | 60    | 150          |
| Primer-2  | VJ6NUA/AhGASA31   | TTATGGCAAAAGAGGCTGCT | ACGCTTGGTCTTCCAGTTGT  | 45/50 | 59.87 | 233          |
| Primer-3  | FK6HB9/AhGASA1    | GCTTCTCGGAGTGTTCTTGC | TCGGTCTTGAGTGCAAACCTG | 55/50 | 60    | 194          |
| Primer-4  | RUJ0QA/AhGASA22   | CCACCCACACCTTATCATCC | TTCGCGGTTACCGTAAGTTC  | 50    | 60    | 216          |
| Primer-5  | VES4LD/AhGASA25   | AAAGTGTGCAAGGAGGTGCT | TTAAGGGCACTTTGGTTTGC  | 50    | 60    | 172          |
| Primer-6  | AVE3D2/AhGASA4    | TGATGCTGCTACCACAGAGG | ACCAGGAGGCACACATAAGC  | 55    | 60    | 217          |
| Primer-7  | 6SHE48/AhGASA9    | TTATGGCAAAAGAGGCTGCT | CGCTTGGTCTTCCAGTTGTT  | 48    | 59    | 232          |
| Primer-8  | FJ610L/AhGASA21   | ATGGACCTGGGAGTGTCAAG | TGTTGTAGCAAGGGCAAACA  | 55/45 | 59    | 203          |
| Primer-9  | F1TUFL/AhGASA40   | GACCTGGCAGTCTCAAGAGC | GCATTTTGGTCCTCCTTCCT  | 55    | 60    | 200          |
| Primer-10 | PW1K78/AhGASA19   | ATTGCAGACACCAATGCAAA | AAGTTCCTGGCGGTACACAC  | 45    | 60    | 226          |
| Primer-11 | YB2114/AhGASA2    | TTTGTGGATTGTGGAGCAAA | TGGGTTTGTGTCATGAGTA   | 45    | 60    | 181          |
| Primer-12 | TJLQ2T/AhGASA13   | GGATGTCTCAATGGCTGGTT | AGGGCACTCGTCCTTATTCC  | 50    | 60    | 160          |
| Primer-13 | JGC745.1/AhGASA8  | ATTCTCCAATGTGGCTGAGG | GGAGGAACACACAGGCATTT  | 50    | 60    | 153          |
| Primer-14 | SY561U.1/AhGASA30 | GGATGTCTCAATGGCTGGTT | AGGGCACTCGTCCTTATTCC  | 52    | 60    | 160          |
| Primer-15 | C0SGC9.1/AhGASA27 | TGTCTTTGCTCCTCCTCCAT | ACGCTCTCTTGACATCCTT   | 50    | 60    | 159          |
| Primer-16 | XBXR9Z.1/AhGASA29 | AGATGCAGCAAAACATCACG | TTAAGGGCACTTGCGTCTG   | 45/52 | 60    | 159          |
| Primer-17 | CH1EP2.1/AhGASA20 | TTTGTGGATTGTGGAGCAAA | GGGCTTGTGTCATGAGTA    | 40/52 | 60    | 180          |
| Primer-18 | RF89RI.1/AhGASA17 | GATGCAGTAAGGCAGGAAGG | GGCACTTCAATTTTCCTCCA  | 55/45 | 60    | 153          |

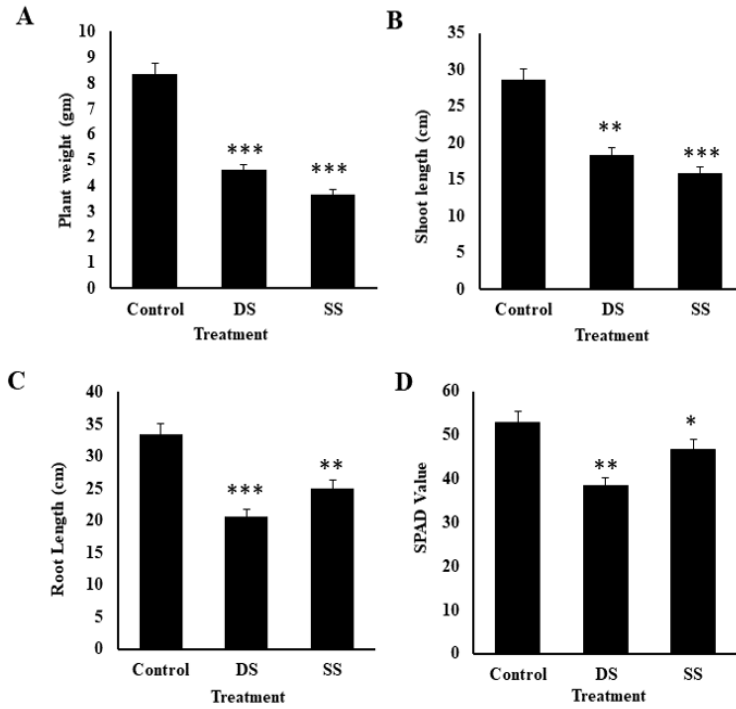

**Figure S1.** Plant attributes under drought, salinity, and control conditions. (A) Plant weight, (B) plant shoot length, (C) root length, and (D) chlorophyll content (SPAD value). Abbreviations: control, well water; DS, drought stress; and SS, salt stress. Data are presented as the mean  $\pm$  standard error of three biological replicates. Means were analyzed for significant differences using Student's *t*-test. Asterisks (\*) indicate significant differences at a 5% level (\*\* $p < 0.001$ , \*\* $p < 0.01$ , \* $p < 0.05$ ).
